# Supplementary material for: PcWRKY11, an II-d WRKY Transcription Factor from Polygonum cuspidatum, Enhances Salt Tolerance in Transgenic Arabidopsis thaliana
Source: MDPI journal article supplement (doi:10.3390/ijms23084357), 2022-04-14
Supplement: s1 [file s1]

Figure S1

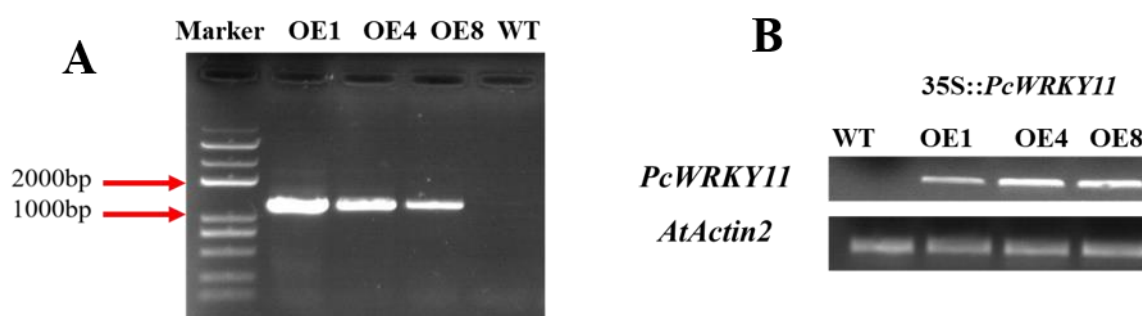

Figure S1. Identification of transgenic *A. thaliana* on DNA and RNA level by PCR. (A) PCR identification on the DNA level of candidate lines. (B) Identification of transgenic plants on RNA level by semi-quantitative RT-PCR. The reference gene of RT-PCR is *Atactin2*; WT, wild type plants; OE1, OE4, OE8, the selected lines for the following experiments.

Figure S2

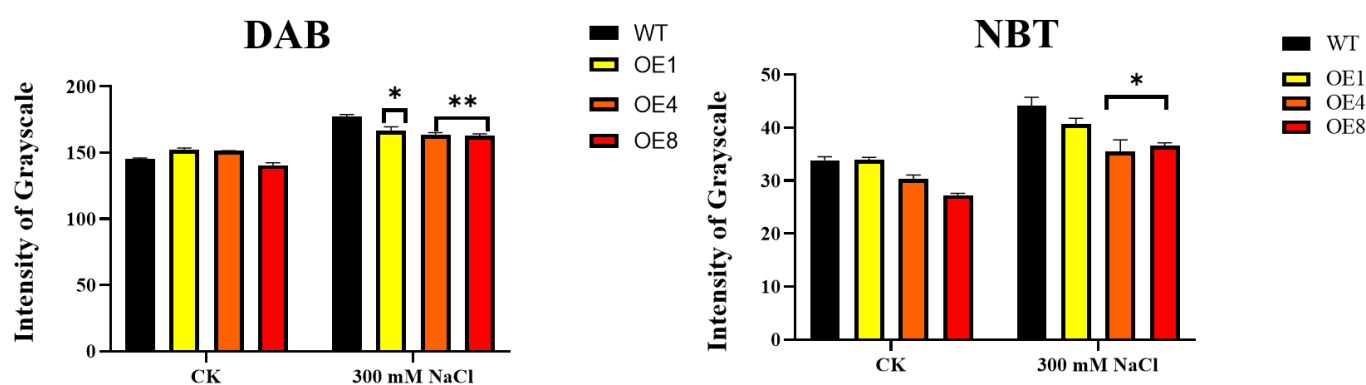

Figure S2. Quantitative analysis of staining results in Figure 5A.

The mean values and standard errors were calculated with three independent experiments. One, two and three asterisks represent significance level  $P < 0.05$ ,  $P < 0.01$  and  $P < 0.001$ ; WT, wild type plants; OE, over-expressed plants; CK, under normal conditions.

Figure S3

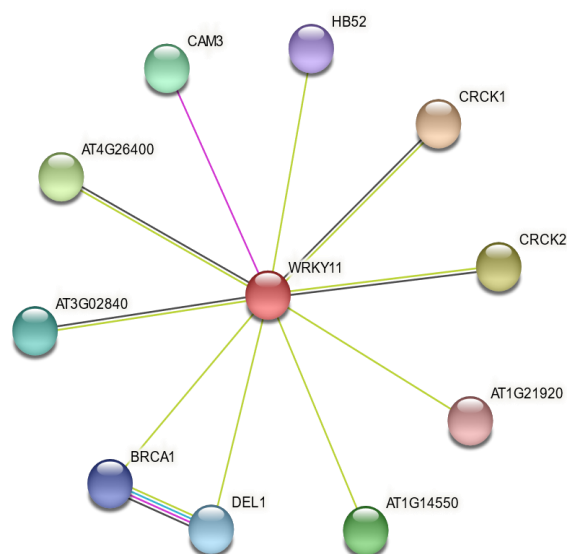

**Figure S3. AtWRKY11 protein STRING interaction network.**

**Table S1. Primer sequences used in this study.**

| Primer            | Sequence (5'-3')                         |
|-------------------|------------------------------------------|
| PcWRKY11-F        | ATGGAGATCCAGCTCCCCG                      |
| PcWRKY11-R        | TTAATTTAATGTCCCCAACGCTGC                 |
| PcWRKY11-QPCR-F   | AGTCTTTCAGCCTGTCGTCG                     |
| PcWRKY11-QPCR-R   | GGCTTCTGGCCGTACTTTCT                     |
| PcNDUFA13-F       | ATGTACCAGGTCGGCGTAGG                     |
| PcNDUFA13-R       | TCCTTCATAATTCTGGCTTCC                    |
| pBI121-PcWRKY11-F | CGGGGGACTCTAGAGGATCCAATGGAGATCCAGCTCCCCG |
| pBI121-PcWRKY11-R | GATCGGGGAAATTCGAGCTCTTACTTGTACAGCTCGTCCA |
| AtActin2-F        | GGTAACATTGTGCTCAGTGGT                    |
| AtActin2-R        | GCATCAATTCGATCACTCAGAG                   |

---

|                   |                                               |
|-------------------|-----------------------------------------------|
| AtP5CS1-F         | AGCTTGATGACGTTATCGATCT                        |
| AtP5CS1-R         | AGATTCCATCAGCATGACCTAG                        |
| AtSOD-F           | AGGAAACATCACTGTTGGAGAT                        |
| AtSOD-R           | GAGTTTGGTCCAGTAAGAGGAA                        |
| AtAPX-F           | GATGTCTTTGCTAAGCAGATGG                        |
| AtAPX-R           | GAGTTGTCTGAAGATTAGAGGGT                       |
| PcWRKY11-EGFP-    | ACACGGGGGACTCTAGAGGATCC                       |
| pBI121-F          | ATGGAGATCCAGCTCCCCG                           |
| PcWRKY11-EGFP-    | GAACGATCGGGGAAATTCGAGCTC                      |
| pBI121-R          | TTAATTTAATGTCCCCAACGCTGC                      |
| PcWRKY11-pB42AD-F | GATTATGCCTCTCCCGAATTCATGGAGATCCAGCTCCCCG      |
| PcWRKY11-pB42AD-R | CTTCTCGAGTCGGCCGAATTCTTAATTTAATGTCCCCAACGCTGC |
| W-box-F           | AATTCTTGACCCCTTTTGACCCGTTTGACCTCCAGGTAC       |
| W-box-R           | CTGGAGGTCAAAACGGGTCAAAAGGGGTCAAG              |
| mW-box-F          | AATTCTAGACCCCTTTAGACCCGTTTAGACCTCCAGGTAC      |
| mW-box-R          | CTGGAGGTCTAAACGGGTCTAAAGGGGTCTAG              |

---
